# Supplementary material for: Scaling of electrical relaxation behaviour of polymer mediated spinel Zn Fe2O4
Source: Research Square preprint supplement (doi:10.21203/rs.3.rs-3197830/v1), 2023-08-03
Supplement: Supplementary file 1 [file 022e8d3b323e6f7ca73a064b.docx]

| S. N. | Sample | hkl | 2 () | d(nm) | a(nm) | Volume | () | D(nm) | Dislocation density | Lattice strain |
| --- | --- | --- | --- | --- | --- | --- | --- | --- | --- | --- |
|  | PEG |  |  |  |  |  |  |  |  |  |
| 1. |  | 311 | 35.24 | 2.54 | 8.42 | 595 | 0.72 | 11.5 | 7.56 | 9.95 |
| 2. |  | 440 | 62.18 | 1.49 | 8.50 | 612 | 0.86 | 10.7 | 8.66 | 6.24 |
| 3. |  | 511 | 56.65 | 1.62 | 8.44 | 599 | 0.87 | 10.4 | 9.31 | 7.05 |
| 4. |  | 422 | 58.19 | 1.72 | 8.43 | 597 | 0.76 | 12 | 6.99 | 5.96 |
| 5. |  | 220 | 29.92 | 2.98 | 8.44 | 593 | 0.63 | 12.9 | 5.97 | 1.04 |
|  | PVA |  |  |  |  |  |  |  |  |  |
| 1. |  | 311 | 35.22 | 2.54 | 8.42 | 597 | 0.63 | 13.1 | 5.87 | 8.77 |
| 2. |  | 440 | 62.20 | 1.49 | 8.50 | 612 | 0.78 | 11.8 | 7.23 | 5.70 |
| 3. |  | 511 | 56.60 | 1.62 | 8.45 | 601 | 0.73 | 12.2 | 6.67 | 5.97 |
| 4. |  | 400 | 42.85 | 2.11 | 8.43 | 599 | 0.53 | 15.9 | 3.95 | 5.96 |
| 5. |  | 220 | 29.90 | 2.98 | 8.45 | 601 | 0.55 | 14.8 | 4.59 | 9.10 |
|  | PVP |  |  |  |  |  |  |  |  |  |
| 1. |  | 311 | 35.24 | 2.54 | 8.42 | 595 | 0.96 | 8.63 | 13.4 | 0.13 |
| 2. |  | 440 | 62.20 | 1.49 | 8.50 | 612 | 0.10 | 9.03 | 12.3 | 7.43 |
| 3. |  | 511 | 56.63 | 1.62 | 8.44 | 601 | 0.10 | 8.53 | 13.8 | 8.57 |
| 4. |  | 400 | 42.78 | 2.11 | 8.44 | 601 | 0.11 | 7.14 | 19.6 | 0.13 |
| 5. |  | 220 | 29.89 | 2.99 | 8.45 | 603 | 0.94 | 8.68 | 13.3 | 0.15 |
