# Supplementary material for: Scaling of electrical relaxation behaviour of polymer mediated spinel Zn Fe2O4
Source: Research Square preprint supplement (doi:10.21203/rs.3.rs-3197830/v1), 2023-08-03
Supplement: Supplementary file 2 [file 1831711203c0f4ff8cd7fb72.docx]

| Sample | Temperature  (˚C) | -dc (S/m) | k (Exponent Factor) | A (Const.) | Hooping Freq. (Hz) |
| --- | --- | --- | --- | --- | --- |
| PVA | 70 | 1.86E-6 | 0.50 | 1.48E-7 | 47 |
|  | 90 | - | 0.49 | 1.29E-7 | 53 |
|  | 110 | - | 0.55 | 8.52E-8 | 90 |
|  | 130 | 3.43E-6 | 0.59 | 7.18E-8 | 95 |
|  | 150 | 1.01E-5 | 0.58 | 9.82E-8 | 1065 |
|  | 170 | 2.43E-5 | 0.56 | 1.75E-7 | 3875 |
|  | 190 | 7.21E-5 | 0.54 | 4.33E-7 | 6074 |
| PEG | 70 | 1.88E-6 | 0.81 | 1.14E-9 | 29 |
|  | 90 | - | 0.44 | 1.30E-7 | 26 |
|  | 110 | - | 0.57 | 4.30E-8 | 28 |
|  | 130 | 7.81E-7 | 0.61 | 3.41E-8 | 50 |
|  | 150 | 6.46E-6 | 0.59 | 7.17E-8 | 1326 |
|  | 170 | 2.18E-5 | 0.53 | 2.79E-7 | 2032 |
|  | 190 | 6.86E-6 | 0.49 | 8E-7 | 4501 |
| PVP | 70 | - | 0.40 | 1.71E-7 | 25 |
|  | 90 | - | 0.48 | 9.35E-8 | 32 |
|  | 110 | - | 0.55 | 5.23E-8 | 51 |
|  | 130 | 4.60E-8 | 0.61 | 3.43E-8 | 103 |
|  | 150 | 3.80E-6 | 0.64 | 3.69E-8 | 424 |
|  | 170 | 1.42E-5 | 0.61 | 8.10E-8 | 1506 |
|  | 190 | 4.76E-5 | 0.56 | 2.52E-7 | 5110 |
