# Supplementary material for: Scaling of electrical relaxation behaviour of polymer mediated spinel Zn Fe2O4
Source: Research Square preprint supplement (doi:10.21203/rs.3.rs-3197830/v1), 2023-08-03
Supplement: Supplementary file 3 [file 4030eae471d0cbccec80cd2e.docx]

| S. No. | Sample | Temperature ( | Relaxation Frequency (Hz) |
| --- | --- | --- | --- |
|  | PVA |  |  |
| 1. |  | 90 | 151 |
| 2. |  | 110 | 170 |
| 3. |  | 130 | 382 |
| 4. |  | 150 | 859 |
| 5. |  | 170 | 1720 |
| 6. |  | 190 | 3445 |
|  | PEG |  |  |
| 1. |  | 90 | 45 |
| 2. |  | 110 | 152 |
| 3. |  | 130 | 381 |
| 4. |  | 150 | 860 |
| 5. |  | 170 | 2168 |
| 6. |  | 190 | 6510 |
|  | PVP |  |  |
| 1. |  | 90 | 190 |
| 2. |  | 110 | 430 |
| 3. |  | 130 | 811 |
| 4. |  | 150 | 1823 |
| 5. |  | 170 | 2579 |
| 6. |  | 190 | 9211 |
