# Supplementary material for: Scaling of electrical relaxation behaviour of polymer mediated spinel Zn Fe2O4
Source: Research Square preprint supplement (doi:10.21203/rs.3.rs-3197830/v1), 2023-08-03
Supplement: Supplementary file 4 [file aad6973df1c5ff6708ec91f7.docx]

| S. No. | Sample | Temperature ( | Relaxation Freq. (Hz) | Beta ( | Peak Height(M) |
| --- | --- | --- | --- | --- | --- |
|  | PVA |  |  |  |  |
| 1. |  | 90 | 4187 | 0.355 | 0.8 |
| 2. |  | 110 | 4874 | 0.34 | 0.81 |
| 3. |  | 130 | 7308 | 0.33 | 0.82 |
| 4. |  | 150 | 8694 | 0.32 | 0.824 |
| 5. |  | 190 | 87952 | 0.31 | 0.84 |
|  | PEG |  |  |  |  |
| 1. |  | 30 | 170 | 0.39 | 0.73 |
| 2. |  | 50 | 510 | 0.38 | 0.6 |
| 3. |  | 70 | 1147 | 0.36 | 0.68 |
| 4. |  | 90 | 1288 | 0.37 | 0.704 |
| 5. |  | 110 | 11147 | 0.34 | 0.706 |
| 6. |  | 170 | 83008 | 0.33 | 0.76 |
| 7. |  | 190 | 163228 | 0.36 | 0.74 |
|  | PVP |  |  |  |  |
| 1. |  | 30 | 1083 | 0.42 | 0.10 |
| 2. |  | 50 | 1147 | 0.39 | 0.97 |
| 3. |  | 90 | 4342 | 0.34 | 0.89 |
| 4. |  | 110 | 9211 | 0.348 | 0.9 |
| 5. |  | 130 | 19542 | 0.347 | 0.91 |
| 6. |  | 150 | 39127 | 0.346 | 0.92 |
| 7. |  | 170 | 93190 | 0.341 | 0.93 |
| 8. |  | 190 | 182444 | 0.31 | 0.94 |
